# Supplementary material
Source: PubMed Central journal article supplement (PMC3136133)
Supplement: NIHMS305503-supplement-Supplementary.pdf [file NIHMS305503-supplement-Supplementary.pdf]

**Synthesis and evaluation of multivalent branched HPMA copolymer-Fab' conjugates targeted to the B-cell antigen CD20**

**R. Johnson, P. Kopečková, and J. Kopeček**

Supporting Information

Binding analysis of each multivalent conjugate was performed as described in the Experimental Procedures section. Briefly, Raji cells grown in RPMI medium containing 10% fetal bovine serum (FBS) were washed twice with Hank's balanced salt solution (HBSS). The cells were adjusted to  $4 \times 10^6$  cells/ml and split into two volumes. To one of the volumes of Raji cells, unlabeled anti-CD20 IgG was added to a final concentration of 500 nM to block CD20 for a negative control. Serial dilutions of  $^{125}\text{I}$ -labeled anti-CD20 IgG, Fab', and multivalent Fab' conjugates were made from 2000 nM to 1 nM of Fab' fragment concentration. Millipore 96-well filter plates, coated with a 1% solution of nonfat dry milk in distilled water and incubated at 4 °C overnight, were washed with HBSS. For each of the serial dilutions, 25  $\mu\text{L}$  of negative control cells were added to a single well, and 25  $\mu\text{L}$  of unblocked cells were added to 3 different wells; then 25  $\mu\text{L}$  of the respective dilutions were added to each well. The filter-well plates were incubated for 90 min at 120 rpm on a shaker at 25 °C. Following incubation, the Raji cells were washed twice with 200  $\mu\text{L}$  of cold HBSS with 10% FBS, and then collected on filters. The filters were allowed to air-dry, removed from the plate and counted. Negative control wells were used to correct for non-specific binding. Isotherms were evaluated with the Sips equation using SigmaPlot software (Systat Software, San Jose, CA).

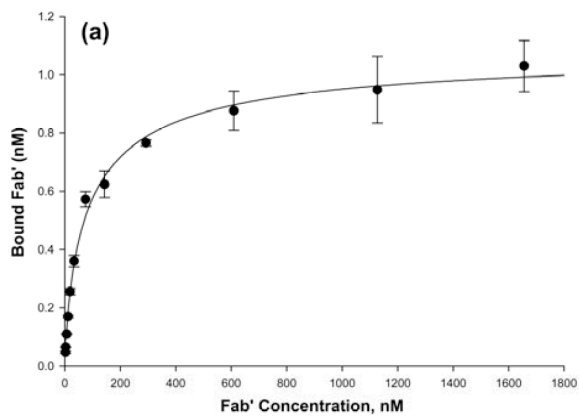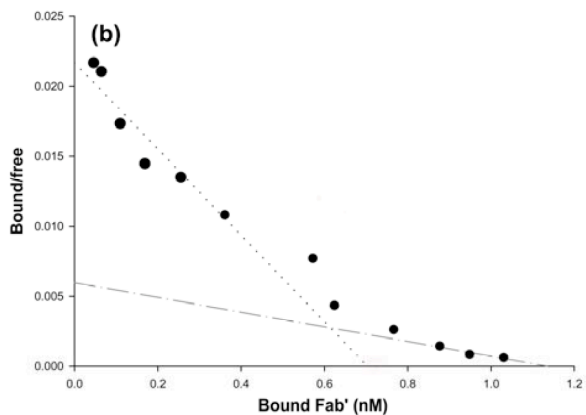

**Supporting Information Figure 1.** Binding analysis of conjugate *P-3Fab1.5*. (a) The isotherm for conjugate *P-3Fab1.5* was fitted with the Sips equation using the least squares method. (b) Scatchard plot of the binding data.

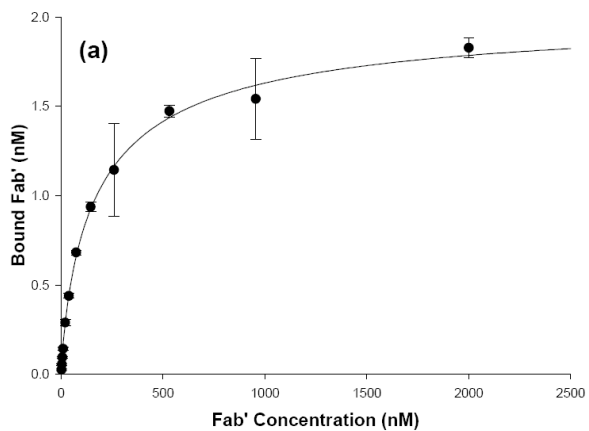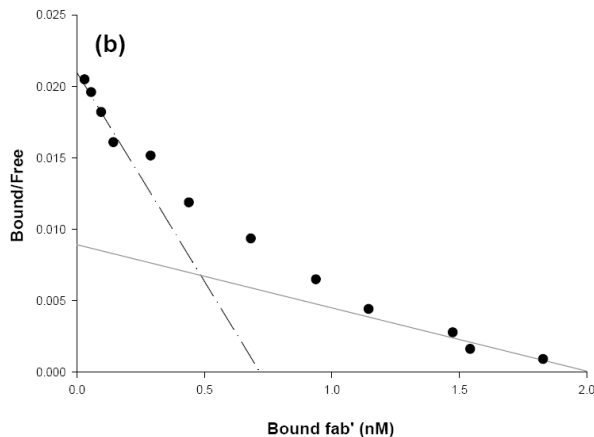

**Supporting Information Figure 2.** Binding analysis of conjugate *P-3Fab2.9*. (a) The isotherm for conjugate *P-3Fab2.9* was fitted with the Sips equation using the least squares method. (b) Scatchard plot of the binding data.

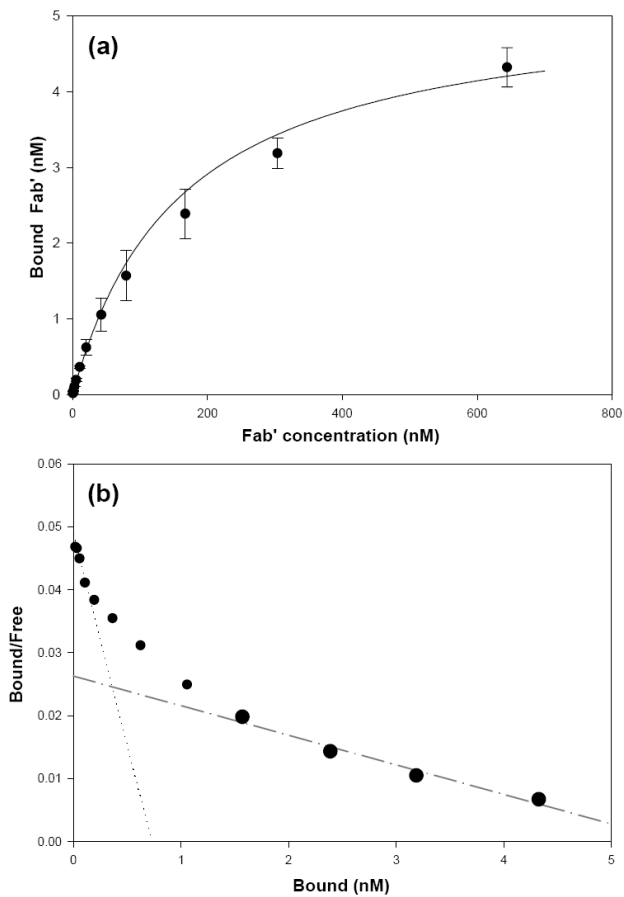

**Supporting Information Figure 3.** Binding analysis of conjugate *P-3Fab8.9*. (a) The isotherm for conjugate *P-3Fab2.9* was fitted with the Sips equation using the least squares method. (b) Scatchard plot of the binding data.

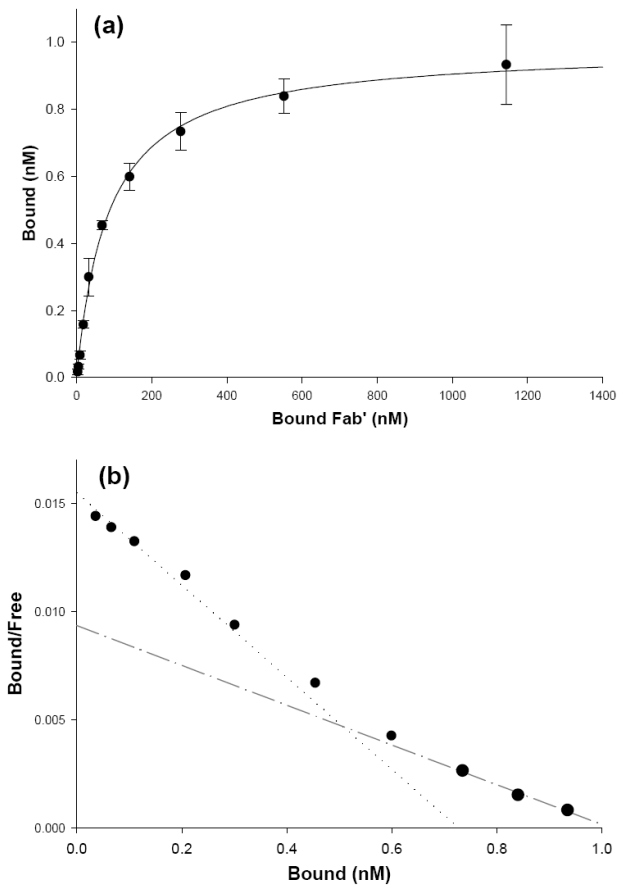

**Supporting Information Figure 4.** Binding analysis of conjugate *P-7Fab1.4*. (a) The isotherm for conjugate *P-3Fab2.9* was fitted with the Sips equation using the least squares method. (b) Scatchard plot of the binding data.
